# Supplementary material for: Passive protection against anthrax in mice with plasma derived from horses hyper-immunized against Bacillus anthracis Sterne strain
Source: PeerJ. 2017 Dec 15;5:e3907. doi: 10.7717/peerj.3907 (PMC5733894; doi:10.7717/peerj.3907)
Supplement: Supplemental Information 2 — Uncollated dataset transcribed from the clinical sheets. [file peerj-05-3907-s002.xlsx]

## Sheet: Sheet1
Concentrated IgG plasma Mouse Challenge
Group: Challenge Control (Challenge/PBS Treatment)						702
Apperance		Score 0-3						N Behavior		Score 0-3						P Behavior		Score 0-3						BCS		Score 0-3						Combined Clinical Score			Score 0-11
Mouse ID		A	B	C	D	E		Mouse ID		A	B	C	D	E		Mouse ID		A	B	C	D	E		Mouse ID		A	B	C	D	E		Mouse ID		A	B	C	D	E
DAY	Time							DAY	Time							DAY	Time							DAY	Time							DAY	Time
1	AM	2	2	2	2	2		1	AM	3	3	3	3	3		1	AM	3	3	3	3	3		1	AM	3	3	3	3	3		1	AM	11	11	11	11	11
	PM	1	1	1	1	1			PM	2	3	2	2	2			PM	2	3	2	2	3			PM	3	3	3	3	3			PM	8	10	8	8	9
2	AM	1	1	1	1	1		2	AM	2	2	2	2	2		2	AM	2	3	2	2	3		2	AM	3	3	3	3	3		2	AM	8	9	8	8	9
	PM	2	2	2	2	2			PM	3	2	3	3	3			PM	3	2	3	3	3			PM	3	3	3	3	3			PM	11	9	11	11	11
3	AM	2	2	2	2	2		3	AM	3	2	3	3	3		3	AM	3	1	3	3	3		3	AM	3	3	3	3	3		3	AM	11	8	11	11	11
	PM	2	X	2	2	2			PM	3	X	3	3	3			PM	3	X	3	3	3			PM	3	X	3	3	3			PM	11	0	11	11	11
4	AM	2		2	2	2		4	AM	3		3	3	3		4	AM	3		3	3	3		4	AM	3		3	3	3		4	AM	11	0	11	11	11
	PM	2		2	2	2			PM	3		3	3	3			PM	3		3	3	3			PM	3		3	3	3			PM	11	0	11	11	11
5	AM	2		2	X	2		5	AM	3		3	X	3		5	AM	3		3	X	3		5	AM	3		3	X	3		5	AM	11	0	11	0	11
	PM	1		1		2			PM	2		3		3			PM	1		3		3			PM	3		3		3			PM	7	0	10	0	11
6	AM	1		1		2		6	AM	2		1		3		6	AM	X		2		3		6	AM	X		3		3		6	AM	3	0	7	0	11
	PM	1		X		2			PM	2		X		3			PM			X		3			PM			X		3			PM	3	0	0	0	11
7	AM	X				2		7	AM	X				3		7	AM					3		7	AM					3		7	AM	0	0	0	0	11
	PM					2			PM					2			PM					2			PM					3			PM	0	0	0	0	9
Group: Challenge Control (Challenge/PBS Treatment)						703
Apperance		Score 0-3						N Behavior		Score 0-3						P Behavior		Score 0-3						BCS		Score 0-3						Combined Clinical Score			Score 0-11
Mouse ID		A	B	C	D	E		Mouse ID		A	B	C	D	E		Mouse ID		A	B	C	D	E		Mouse ID		A	B	C	D	E		Mouse ID		703A	703B	703C	703D	703E
DAY	Time							DAY	Time							DAY	Time							DAY	Time							DAY	Time
1	AM	2	2	2	2	2		1	AM	3	3	3	3	3		1	AM	3	3	3	3	3		1	AM	3	3	3	3	3		1	AM	11	11	11	11	11
	PM	1	1	1	1	1			PM	2	2	2	2	2			PM	2	2	2	2	2			PM	3	3	3	3	3			PM	8	8	8	8	8
2	AM	2	2	2	1	2		2	AM	3	3	2	2	3		2	AM	3	3	3	3	3		2	AM	3	3	3	3	3		2	AM	11	11	10	9	11
	PM	2	2	1	1	2			PM	3	3	2	2	3			PM	3	3	3	3	3			PM	3	3	3	3	3			PM	11	11	9	9	11
3	AM	2	2	2	2	1		3	AM	3	3	3	3	3		3	AM	3	3	3	3	3		3	AM	3	3	3	3	3		3	AM	11	11	11	11	10
	PM	2	2	2	2	2			PM	3	3	3	3	3			PM	3	3	3	3	3			PM	3	3	3	3	3			PM	11	11	11	11	11
4	AM	2	2	1	1	2		4	AM	3	3	3	3	3		4	AM	3	3	3	3	3		4	AM	3	3	3	3	3		4	AM	11	11	10	10	11
	PM	2	1	2	2	2			PM	3	2	3	3	3			PM	3	2	3	3	3			PM	3	3	3	3	3			PM	11	8	11	11	11
5	AM	2	1	2	2	2		5	AM	3	2	3	3	3		5	AM	3	2	3	3	3		5	AM	3	3	3	3	3		5	AM	11	8	11	11	11
	PM	2	X	2	2	2			PM	3	X	3	3	3			PM	3	X	3	3	3			PM	3	X	3	3	3			PM	11	0	11	11	11
6	AM	2		2	1	2		6	AM	3		3	2	3		6	AM	3		3	2	3		6	AM	3		3	3	3		6	AM	11	0	11	8	11
	PM	2		1	X	1			PM	3		2	X	3			PM	3		2	X	3			PM	3		3	X	3			PM	11	0	8	0	10
7	AM	1		1		1		7	AM	2		1		2		7	AM	2		1		3		7	AM	3		3		3		7	AM	8	0	6	0	9
	PM	X		X		X			PM	X		X		X			PM	X		X		X			PM	X		X		X			PM	0	0	0	0	0
		Dead
Group: Challenge Control (Challenge/PBS Treatment)						704
Apperance		Score 0-3						N Behavior		Score 0-3						P Behavior		Score 0-3						BCS		Score 0-3						Combined Clinical Score			Score 0-11
Mouse ID		A	B	C	D	E		Mouse ID		A	B	C	D	E		Mouse ID		A	B	C	D	E		Mouse ID		A	B	C	D	E		Mouse ID		A	B	C	D	E
DAY	Time							DAY	Time							DAY	Time							DAY	Time							DAY	Time
1	AM	2	2	2	2	2		1	AM	3	3	3	3	3		1	AM	3	3	3	3	3		1	AM	3	3	3	3	3		1	AM	11	11	11	11	11
	PM	1	1	1	1	1			PM	2	2	2	2	2			PM	2	2	2	2	2			PM	3	3	3	3	3			PM	8	8	8	8	8
2	AM	2	2	1	2	2		2	AM	2	2	2	2	2		2	AM	3	3	3	3	3		2	AM	3	3	3	3	3		2	AM	10	10	9	10	10
	PM	1	2	1	1	2			PM	3	3	2	2	3			PM	3	3	3	3	3			PM	3	3	3	3	3			PM	10	11	9	9	11
3	AM	2	2	1	2	1		3	AM	3	3	2	3	2		3	AM	3	3	3	3	3		3	AM	3	3	3	3	3		3	AM	11	11	9	11	9
	PM	2	2	2	2	2			PM	3	3	2	3	2			PM	3	3	3	3	3			PM	3	3	3	3	3			PM	11	11	10	11	10
4	AM	2	2	2	2	2		4	AM	3	3	3	3	3		4	AM	3	3	3	3	3		4	AM	3	3	3	3	3		4	AM	11	11	11	11	11
	PM	2	1	1	2	1			PM	3	2	2	3	2			PM	3	2	2	3	2			PM	3	3	3	3	3			PM	11	8	8	11	8
5	AM	2	1	1	2	1		5	AM	3	2	2	3	2		5	AM	3	2	3	3	2		5	AM	3	3	3	3	3		5	AM	11	8	9	11	8
	PM	2	1	2	2	1			PM	3	2	3	3	2			PM	3	3	3	3	2			PM	3	3	3	3	3			PM	11	9	11	11	8
6	AM	2	2	2	2	X		6	AM	3	3	3	3	X		6	AM	3	3	3	3	X		6	AM	3	3	3	3	X		6	AM	11	11	11	11	0
	PM	2	2	2	2				PM	3	3	3	3				PM	3	3	3	3				PM	3	3	3	3				PM	11	11	11	11	0
7	AM	1	1	X	1			7	AM	2	2	X	2			7	AM	2	3	X	2			7	AM	3	3	X	3			7	AM	8	9	0	8	0
	PM	X	X		X				PM	X	X		X				PM	X	X		X				PM	X	X		X				PM	0	0	0	0	0
Group: Process Control (PBS Challenge/PBS Treatment)						705
Apperance		Score 0-3						N Behavior		Score 0-3						P Behavior		Score 0-3						BCS		Score 0-3						Combined Clinical Score			Score 0-11
Mouse ID		A	B	C	D	E		Mouse ID		A	B	C	D	E		Mouse ID		A	B	C	D	E		Mouse ID		A	B	C	D	E		Mouse ID		A	B	C	D	E
DAY	Time							DAY	Time							DAY	Time							DAY	Time							DAY	Time
1	AM	2	2	2	2	2		1	AM	3	3	3	3	3		1	AM	3	3	3	3	3		1	AM	3	3	3	3	3		1	AM	11	11	11	11	11
	PM	1	1	1	1	1			PM	2	2	2	2	2			PM	2	2	2	2	2			PM	3	3	3	3	3			PM	8	8	8	8	8
2	AM	2	2	2	2	2		2	AM	3	3	3	3	3		2	AM	3	3	3	3	3		2	AM	3	3	3	3	3		2	AM	11	11	11	11	11
	PM	2	2	2	2	2			PM	3	3	3	3	3			PM	3	3	3	3	3			PM	3	3	3	3	3			PM	11	11	11	11	11
3	AM	2	2	2	2	2		3	AM	3	3	3	3	3		3	AM	3	3	3	3	3		3	AM	3	3	3	3	3		3	AM	11	11	11	11	11
	PM	2	2	2	2	2			PM	3	3	3	3	3			PM	3	3	3	3	3			PM	3	3	3	3	3			PM	11	11	11	11	11
4	AM	2	2	2	2	2		4	AM	3	3	3	3	3		4	AM	3	3	3	3	3		4	AM	3	3	3	3	3		4	AM	11	11	11	11	11
	PM	2	2	2	2	2			PM	3	3	3	3	3			PM	3	3	3	3	3			PM	3	3	3	3	3			PM	11	11	11	11	11
5	AM	2	2	2	2	2		5	AM	3	3	3	3	3		5	AM	3	3	3	3	3		5	AM	3	3	3	3	3		5	AM	11	11	11	11	11
	PM	2	2	2	2	2			PM	3	3	3	3	3			PM	3	3	3	3	3			PM	3	3	3	3	3			PM	11	11	11	11	11
6	AM	2	2	2	2	2		6	AM	3	3	3	3	3		6	AM	3	3	3	3	3		6	AM	3	3	3	3	3		6	AM	11	11	11	11	11
	PM	2	2	2	2	2			PM	3	3	3	3	3			PM	3	3	3	3	3			PM	3	3	3	3	3			PM	11	11	11	11	11
7	AM	2	2	2	2	2		7	AM	3	3	3	3	3		7	AM	3	3	3	3	3		7	AM	3	3	3	3	3		7	AM	11	11	11	11	11
	PM	2	2	2	2	2			PM	3	3	3	3	3			PM	3	3	3	3	3			PM	3	3	3	3	3			PM	11	11	11	11	11
Group: Process Control (PBS Challenge/PBS Treatment)						706
Apperance		Score 0-3						N Behavior		Score 0-3						P Behavior		Score 0-3						BCS		Score 0-3						Combined Clinical Score			Score 0-11
Mouse ID		A	B	C	D	E		Mouse ID		A	B	C	D	E		Mouse ID		A	B	C	D	E		Mouse ID		A	B	C	D	E		Mouse ID		A	B	C	D	E
DAY	Time							DAY	Time							DAY	Time							DAY	Time							DAY	Time
1	AM	2	2	2	2	2		1	AM	3	3	3	3	3		1	AM	3	3	3	3	3		1	AM	3	3	3	3	3		1	AM	11	11	11	11	11
	PM	1	1	1	1	1			PM	2	2	2	2	2			PM	2	2	2	2	2			PM	3	3	3	3	3			PM	8	8	8	8	8
2	AM	2	2	2	2	2		2	AM	3	3	3	3	3		2	AM	3	3	3	3	3		2	AM	3	3	3	3	3		2	AM	11	11	11	11	11
	PM	2	2	2	2	2			PM	3	3	3	3	3			PM	3	3	3	3	3			PM	3	3	3	3	3			PM	11	11	11	11	11
3	AM	2	2	2	2	2		3	AM	3	3	3	3	3		3	AM	3	3	3	3	3		3	AM	3	3	3	3	3		3	AM	11	11	11	11	11
	PM	2	2	2	2	2			PM	3	3	3	3	3			PM	3	3	3	3	3			PM	3	3	3	3	3			PM	11	11	11	11	11
4	AM	2	2	2	2	2		4	AM	3	3	3	3	3		4	AM	3	3	3	3	3		4	AM	3	3	3	3	3		4	AM	11	11	11	11	11
	PM	2	2	2	2	2			PM	3	3	3	3	3			PM	3	3	3	3	3			PM	3	3	3	3	3			PM	11	11	11	11	11
5	AM	2	2	2	2	2		5	AM	3	3	3	3	3		5	AM	3	3	3	3	3		5	AM	3	3	3	3	3		5	AM	11	11	11	11	11
	PM	2	2	2	2	2			PM	3	3	3	3	3			PM	3	3	3	3	3			PM	3	3	3	3	3			PM	11	11	11	11	11
6	AM	2	2	2	2	2		6	AM	3	3	3	3	3		6	AM	3	3	3	3	3		6	AM	3	3	3	3	3		6	AM	11	11	11	11	11
	PM	2	2	2	2	2			PM	3	3	3	3	3			PM	3	3	3	3	3			PM	3	3	3	3	3			PM	11	11	11	11	11
7	AM	2	2	2	2	2		7	AM	3	3	3	3	3		7	AM	3	3	3	3	3		7	AM	3	3	3	3	3		7	AM	11	11	11	11	11
	PM	2	2	2	2	2			PM	3	3	3	3	3			PM	3	3	3	3	3			PM	3	3	3	3	3			PM	11	11	11	11	11
Group: Process Control (PBS Challenge/ PBS Treatment)						707
Apperance		Score 0-3						N Behavior		Score 0-3						P Behavior		Score 0-3						BCS		Score 0-3						Combined Clinical Score			Score 0-11
Mouse ID		A	B	C	D	E		Mouse ID		A	B	C	D	E		Mouse ID		A	B	C	D	E		Mouse ID		A	B	C	D	E		Mouse ID		A	B	C	D	E
DAY	Time							DAY	Time							DAY	Time							DAY	Time							DAY	Time
1	AM	2	2	2	2	2		1	AM	3	3	3	3	3		1	AM	3	3	3	3	3		1	AM	3	3	3	3	3		1	AM	11	11	11	11	11
	PM	1	1	1	1	1			PM	2	2	2	2	2			PM	2	2	2	2	2			PM	3	3	3	3	3			PM	8	8	8	8	8
2	AM	2	2	2	2	2		2	AM	3	3	3	3	3		2	AM	3	3	3	3	3		2	AM	3	3	3	3	3		2	AM	11	11	11	11	11
	PM	2	2	2	2	2			PM	3	3	3	3	3			PM	3	3	3	3	3			PM	3	3	3	3	3			PM	11	11	11	11	11
3	AM	2	2	2	2	2		3	AM	3	3	3	3	3		3	AM	3	3	3	3	3		3	AM	3	3	3	3	3		3	AM	11	11	11	11	11
	PM	2	2	2	2	2			PM	3	3	3	3	3			PM	3	3	3	3	3			PM	3	3	3	3	3			PM	11	11	11	11	11
4	AM	2	2	2	2	2		4	AM	3	3	3	3	3		4	AM	3	3	3	3	3		4	AM	3	3	3	3	3		4	AM	11	11	11	11	11
	PM	2	2	2	2	2			PM	3	3	3	3	3			PM	3	3	3	3	3			PM	3	3	3	3	3			PM	11	11	11	11	11
5	AM	2	2	2	2	2		5	AM	3	3	3	3	3		5	AM	3	3	3	3	3		5	AM	3	3	3	3	3		5	AM	11	11	11	11	11
	PM	2	2	2	2	2			PM	3	3	3	3	3			PM	3	3	3	3	3			PM	3	3	3	3	3			PM	11	11	11	11	11
6	AM	2	2	2	2	2		6	AM	3	3	3	3	3		6	AM	3	3	3	3	3		6	AM	3	3	3	3	3		6	AM	11	11	11	11	11
	PM	2	2	2	2	2			PM	3	3	3	3	3			PM	3	3	3	3	3			PM	3	3	3	3	3			PM	11	11	11	11	11
7	AM	2	2	2	2	2		7	AM	3	3	3	3	3		7	AM	3	3	3	3	3		7	AM	3	3	3	3	3		7	AM	11	11	11	11	11
	PM	2	2	2	2	2			PM	3	3	3	3	3			PM	3	3	3	3	3			PM	3	3	3	3	3			PM	11	11	11	11	11
Group: Treatment Control (PBS Challenge/Plasma)					708
Apperance		Score 0-3						N Behavior		Score 0-3						P Behavior		Score 0-3						BCS		Score 0-3
Mouse ID		A	B	C	D	E		Mouse ID		A	B	C	D	E		Mouse ID		A	B	C	D	E		Mouse ID		A	B	C	D	E		Combined Clinical Score			Score 0-11
DAY	Time							DAY	Time							DAY	Time							DAY	Time							Mouse ID		A	B	C	D	E
1	AM	2	2	2	2	2		1	AM	3	3	3	3	3		1	AM	3	3	3	3	3		1	AM	3	3	3	3	3		DAY	Time
	PM	1	1	1	1	1			PM	2	2	2	2	2			PM	2	2	2	2	2			PM	3	3	3	3	3		1	AM	11	11	11	11	11
2	AM	2	2	2	2	2		2	AM	3	3	3	3	3		2	AM	3	3	3	3	3		2	AM	3	3	3	3	3			PM	8	8	8	8	8
	PM	2	2	2	2	2			PM	3	3	3	3	3			PM	3	3	3	3	3			PM	3	3	3	3	3		2	AM	11	11	11	11	11
3	AM	2	2	2	2	2		3	AM	3	3	3	3	3		3	AM	3	3	3	3	3		3	AM	3	3	3	3	3			PM	11	11	11	11	11
	PM	2	2	2	2	2			PM	3	3	3	3	3			PM	3	3	3	3	3			PM	3	3	3	3	3		3	AM	11	11	11	11	11
4	AM	2	2	2	2	2		4	AM	3	3	3	3	3		4	AM	3	3	3	3	3		4	AM	3	3	3	3	3			PM	11	11	11	11	11
	PM	2	2	2	2	2			PM	3	3	3	3	3			PM	3	3	3	3	3			PM	3	3	3	3	3		4	AM	11	11	11	11	11
5	AM	2	2	2	2	2		5	AM	3	3	3	3	3		5	AM	3	3	3	3	3		5	AM	3	3	3	3	3			PM	11	11	11	11	11
	PM	2	2	2	2	2			PM	3	3	3	3	3			PM	3	3	3	3	3			PM	3	3	3	3	3		5	AM	11	11	11	11	11
6	AM	2	2	2	2	2		6	AM	3	3	3	3	3		6	AM	3	3	3	3	3		6	AM	3	3	3	3	3			PM	11	11	11	11	11
	PM	2	2	2	2	2			PM	3	3	3	3	3			PM	3	3	3	3	3			PM	3	3	3	3	3		6	AM	11	11	11	11	11
7	AM	2	2	2	2	2		7	AM	3	3	3	3	3		7	AM	3	3	3	3	3		7	AM	3	3	3	3	3			PM	11	11	11	11	11
	PM	2	2	2	2	2			PM	3	3	3	3	3			PM	3	3	3	3	3			PM	3	3	3	3	3		7	AM	11	11	11	11	11
																																	PM	11	11	11	11	11
Group: Treatment Control (PBS Challenge/Plasma)					709
Apperance		Score 0-3						N Behavior		Score 0-3						P Behavior		Score 0-3						BCS		Score 0-3						Combined Clinical Score			Score 0-11
Mouse ID		A	B	C	D	E		Mouse ID		A	B	C	D	E		Mouse ID		A	B	C	D	E		Mouse ID		A	B	C	D	E		Mouse ID		A	B	C	D	E
DAY	Time							DAY	Time							DAY	Time							DAY	Time							DAY	Time
1	AM	2	2	2	2	2		1	AM	3	3	3	3	3		1	AM	3	3	3	3	3		1	AM	3	3	3	3	3		1	AM	11	11	11	11	11
	PM	1	1	1	1	1			PM	2	2	2	2	2			PM	2	2	2	2	2			PM	3	3	3	3	3			PM	8	8	8	8	8
2	AM	2	2	2	2	2		2	AM	3	3	3	3	3		2	AM	3	3	3	3	3		2	AM	3	3	3	3	3		2	AM	11	11	11	11	11
	PM	2	2	2	2	2			PM	3	3	3	3	3			PM	3	3	3	3	3			PM	3	3	3	3	3			PM	11	11	11	11	11
3	AM	2	2	2	2	2		3	AM	3	3	3	3	3		3	AM	3	3	3	3	3		3	AM	3	3	3	3	3		3	AM	11	11	11	11	11
	PM	2	2	2	2	2			PM	3	3	3	3	3			PM	3	3	3	3	3			PM	3	3	3	3	3			PM	11	11	11	11	11
4	AM	2	2	2	2	2		4	AM	3	3	3	3	3		4	AM	3	3	3	3	3		4	AM	3	3	3	3	3		4	AM	11	11	11	11	11
	PM	2	2	2	2	2			PM	3	3	3	3	3			PM	3	3	3	3	3			PM	3	3	3	3	3			PM	11	11	11	11	11
5	AM	2	2	2	2	2		5	AM	3	3	3	3	3		5	AM	3	3	3	3	3		5	AM	3	3	3	3	3		5	AM	11	11	11	11	11
	PM	2	2	2	2	2			PM	3	3	3	3	3			PM	3	3	3	3	3			PM	3	3	3	3	3			PM	11	11	11	11	11
6	AM	2	2	2	2	2		6	AM	3	3	3	3	3		6	AM	3	3	3	3	3		6	AM	3	3	3	3	3		6	AM	11	11	11	11	11
	PM	2	2	2	2	2			PM	3	3	3	3	3			PM	3	3	3	3	3			PM	3	3	3	3	3			PM	11	11	11	11	11
7	AM	2	2	2	2	2		7	AM	3	3	3	3	3		7	AM	3	3	3	3	3		7	AM	3	3	3	3	3		7	AM	11	11	11	11	11
	PM	2	2	2	2	2			PM	3	3	3	3	3			PM	3	3	3	3	3			PM	3	3	3	3	3			PM	11	11	11	11	11
Group: Treatment Control (PBS Challenge/Plasma)					710
Apperance		Score 0-3						N Behavior		Score 0-3						P Behavior		Score 0-3						BCS		Score 0-3						Combined Clinical Score			Score 0-11
Mouse ID		A	B	C	D	E		Mouse ID		A	B	C	D	E		Mouse ID		A	B	C	D	E		Mouse ID		A	B	C	D	E		Mouse ID		A	B	C	D	E
DAY	Time							DAY	Time							DAY	Time							DAY	Time							DAY	Time
1	AM	2	2	2	2	2		1	AM	3	3	3	3	3		1	AM	3	3	3	3	3		1	AM	3	3	3	3	3		1	AM	11	11	11	11	11
	PM	1	1	1	1	1			PM	2	2	2	2	2			PM	2	2	2	2	2			PM	3	3	3	3	3			PM	8	8	8	8	8
2	AM	2	2	2	2	2		2	AM	3	3	3	3	3		2	AM	3	3	3	3	3		2	AM	3	3	3	3	3		2	AM	11	11	11	11	11
	PM	2	2	2	2	2			PM	3	3	3	3	3			PM	3	3	3	3	3			PM	3	3	3	3	3			PM	11	11	11	11	11
3	AM	2	2	2	2	2		3	AM	3	3	3	3	3		3	AM	3	3	3	3	3		3	AM	3	3	3	3	3		3	AM	11	11	11	11	11
	PM	2	2	2	2	2			PM	3	3	3	3	3			PM	3	3	3	3	3			PM	3	3	3	3	3			PM	11	11	11	11	11
4	AM	2	2	2	2	2		4	AM	3	3	3	3	3		4	AM	3	3	3	3	3		4	AM	3	3	3	3	3		4	AM	11	11	11	11	11
	PM	2	2	2	2	2			PM	3	3	3	3	3			PM	3	3	3	3	3			PM	3	3	3	3	3			PM	11	11	11	11	11
5	AM	2	2	2	2	2		5	AM	3	3	3	3	3		5	AM	3	3	3	3	3		5	AM	3	3	3	3	3		5	AM	11	11	11	11	11
	PM	2	2	2	2	2			PM	3	3	3	3	3			PM	3	3	3	3	3			PM	3	3	3	3	3			PM	11	11	11	11	11
6	AM	2	2	2	2	2		6	AM	3	3	3	3	3		6	AM	3	3	3	3	3		6	AM	3	3	3	3	3		6	AM	11	11	11	11	11
	PM	2	2	2	2	2			PM	3	3	3	3	3			PM	3	3	3	3	3			PM	3	3	3	3	3			PM	11	11	11	11	11
7	AM	2	2	2	2	2		7	AM	3	3	3	3	3		7	AM	3	3	3	3	3		7	AM	3	3	3	3	3		7	AM	11	11	11	11	11
	PM	2	2	2	2	2			PM	3	3	3	3	3			PM	3	3	3	3	3			PM	3	3	3	3	3			PM	11	11	11	11	11
Group: Principal 1 (IN Challenge/Plasma)					711
Apperance		Score 0-3						N Behavior		Score 0-3						P Behavior		Score 0-3						BCS		Score 0-3						Combined Clinical Score			Score 0-11
Mouse ID		A	B	C	D	E		Mouse ID		A	B	C	D	E		Mouse ID		A	B	C	D	E		Mouse ID		A	B	C	D	E		Mouse ID		A	B	C	D	E
DAY	Time							DAY	Time							DAY	Time							DAY	Time							DAY	Time
1	AM	2	2	2	2	2		1	AM	3	3	3	3	3		1	AM	3	3	3	3	3		1	AM	3	3	3	3	3		1	AM	11	11	11	11	11
	PM	1	1	1	1	1			PM	2	2	2	2	2			PM	2	2	2	2	2			PM	3	3	3	3	3			PM	8	8	8	8	8
2	AM	2	1	1	2	1		2	AM	3	3	3	3	3		2	AM	3	3	3	3	3		2	AM	3	3	3	3	3		2	AM	11	10	10	11	10
	PM	2	2	2	2	1			PM	3	3	3	3	3			PM	3	3	3	3	3			PM	3	3	3	3	3			PM	11	11	11	11	10
3	AM	2	2	2	1	2		3	AM	3	3	3	2	3		3	AM	3	3	3	2	3		3	AM	3	3	3	3	3		3	AM	11	11	11	8	11
	PM	2	2	2	1	2			PM	3	3	3	3	3			PM	3	3	3	3	3			PM	3	3	3	3	3			PM	11	11	11	10	11
4	AM	2	2	2	1	2		4	AM	3	3	3	2	3		4	AM	3	3	3	3	3		4	AM	3	3	3	3	3		4	AM	11	11	11	9	11
	PM	2	2	2	1	2			PM	3	3	3	2	3			PM	3	3	3	3	3			PM	3	3	3	3	3			PM	11	11	11	9	11
5	AM	2	2	2	1	2		5	AM	3	3	3	2	3		5	AM	3	3	2	3	3		5	AM	3	3	3	3	3		5	AM	11	11	10	9	11
	PM	2	2	2	1	2			PM	3	3	3	2	3			PM	3	3	3	3	3			PM	3	3	3	3	3			PM	11	11	11	9	11
6	AM	2	2	2	2	2		6	AM	3	3	3	3	3		6	AM	3	3	3	3	3		6	AM	3	3	3	3	3		6	AM	11	11	11	11	11
	PM	2	2	2	1	2			PM	3	3	3	3	3			PM	3	3	3	3	3			PM	3	3	3	3	3			PM	11	11	11	10	11
7	AM	2	2	2	1	2		7	AM	3	3	3	2	3		7	AM	3	3	3	3	3		7	AM	3	3	3	3	3		7	AM	11	11	11	9	11
	PM	2	2	2	1	2			PM	3	3	3	3	3			PM	3	3	3	3	3			PM	3	3	3	3	3			PM	11	11	11	10	11
Group: Principal 1 (IN Challenge/Plasma)					712
Apperance		Score 0-3						N Behavior		Score 0-3						P Behavior		Score 0-3						BCS		Score 0-3						Combined Clinical Score			Score 0-11
Mouse ID		A	B	C	D	E		Mouse ID		A	B	C	D	E		Mouse ID		A	B	C	D	E		Mouse ID		A	B	C	D	E		Mouse ID		A	B	C	D	E
DAY	Time							DAY	Time							DAY	Time							DAY	Time							DAY	Time
1	AM	2	2	2	2	2		1	AM	3	3	3	3	3		1	AM	3	3	3	3	3		1	AM	3	3	3	3	3		1	AM	11	11	11	11	11
	PM	1	1	1	1	1			PM	2	2	2	2	2			PM	2	2	2	2	2			PM	3	3	3	3	3			PM	8	8	8	8	8
2	AM	2	1	2	2	1		2	AM	3	3	3	3	3		2	AM	3	3	3	3	3		2	AM	3	3	3	3	3		2	AM	11	10	11	11	10
	PM	2	1	2	2	1			PM	3	2	3	3	2			PM	3	3	3	3	3			PM	3	3	3	3	3			PM	11	9	11	11	9
3	AM	2	2	2	2	2		3	AM	3	3	3	3	3		3	AM	3	3	3	3	3		3	AM	3	3	3	3	3		3	AM	11	11	11	11	11
	PM	2	2	2	2	2			PM	3	3	3	3	3			PM	3	3	3	3	3			PM	3	3	3	3	3			PM	11	11	11	11	11
4	AM	2	2	2	2	2		4	AM	3	3	3	3	3		4	AM	3	3	3	3	3		4	AM	3	3	3	3	3		4	AM	11	11	11	11	11
	PM	2	2	2	2	2			PM	3	3	3	3	3			PM	3	3	3	3	3			PM	3	3	3	3	3			PM	11	11	11	11	11
5	AM	2	2	2	2	2		5	AM	3	3	3	3	3		5	AM	3	3	3	3	3		5	AM	3	3	3	3	3		5	AM	11	11	11	11	11
	PM	2	2	2	2	1			PM	3	3	3	3	3			PM	3	3	3	3	3			PM	3	3	3	3	3			PM	11	11	11	11	10
6	AM	2	2	2	2	2		6	AM	3	3	3	3	3		6	AM	3	3	3	3	3		6	AM	3	3	3	3	3		6	AM	11	11	11	11	11
	PM	2	2	2	2	2			PM	3	3	3	3	3			PM	3	3	3	3	3			PM	3	3	3	3	3			PM	11	11	11	11	11
7	AM	2	2	2	2	2		7	AM	3	3	3	3	3		7	AM	3	3	3	3	3		7	AM	3	3	3	3	3		7	AM	11	11	11	11	11
	PM	2	2	2	2	2			PM	3	3	3	3	3			PM	3	3	3	3	3			PM	3	3	3	3	3			PM	11	11	11	11	11
Group: Principal 1 (IN Challenge/Plasma)					713
Apperance		Score 0-3						N Behavior		Score 0-3						P Behavior		Score 0-3						BCS		Score 0-3						Combined Clinical Score			Score 0-11
Mouse ID		A	B	C	D	E		Mouse ID		A	B	C	D	E		Mouse ID		A	B	C	D	E		Mouse ID		A	B	C	D	E		Mouse ID		A	B	C	D	E
DAY	Time							DAY	Time							DAY	Time							DAY	Time							DAY	Time
1	AM	2	2	2	2	2	0.5	1	AM	3	3	3	3	3		1	AM	3	3	3	3	3		1	AM	3	3	3	3	3		1	AM	11	11	11	11	11
	PM	1	1	1	1	1	1		PM	2	2	2	2	2			PM	2	2	2	2	2			PM	3	3	3	3	3			PM	8	8	8	8	8
2	AM	2	2	1	2	2	1.5	2	AM	3	3	2	3	3		2	AM	3	3	3	3	3		2	AM	3	3	3	3	3		2	AM	11	11	9	11	11
	PM	2	2	1	2	2	2		PM	3	3	2	3	2			PM	3	3	3	3	3			PM	3	3	3	3	3			PM	11	11	9	11	10
3	AM	2	2	X	2	2	2.5	3	AM	2	3	X	3	3		3	AM	3	3	X	3	3		3	AM	3	3	X	3	3		3	AM	10	11	0	11	11
	PM	2	2		2	2	3		PM	1	3		3	3			PM	1	3		3	3			PM	3	3		3	3			PM	7	11	0	11	11
4	AM	X	2		2	2	3.5	4	AM	X	3		3	3		4	AM	X	3		3	3		4	AM	X	3		3	3		4	AM	0	11	0	11	11
	PM		2		2	2	4		PM		2		3	3			PM		3		3	3			PM		3		3	3			PM	0	10	0	11	11
5	AM		2		1	2	4.5	5	AM		2		2	3		5	AM		3		3	3		5	AM		3		3	3		5	AM	0	10	0	9	11
	PM		2		1	2	5		PM		2		3	3			PM		3		3	3			PM		3		3	3			PM	0	10	0	10	11
6	AM		1		1	2	5.5	6	AM		2		3	3		6	AM		2		3	3		6	AM		3		3	3		6	AM	0	8	0	10	11
	PM		2		2	2	6		PM		2		3	3			PM		3		3	3			PM		3		3	3			PM	0	10	0	11	11
7	AM		2		2	2	6.5	7	AM		3		3	3		7	AM		3		3	3		7	AM		3		3	3		7	AM	0	11	0	11	11
	PM		2		2	2	7		PM		3		3	3			PM		3		3	3			PM		3		3	3			PM	0	11	0	11	11
Group: Principal 2 (SQ Challenge/Plasma)					714
Apperance		Score 0-3						N Behavior		Score 0-3						P Behavior		Score 0-3						BCS		Score 0-3						Combined Clinical Score			Score 0-11
Mouse ID		A	B	C	D	E		Mouse ID		A	B	C	D	E		Mouse ID		A	B	C	D	E		Mouse ID		A	B	C	D	E		Mouse ID		A	B	C	D	E
DAY	Time							DAY	Time							DAY	Time							DAY	Time							DAY	Time
1	AM	2	2	2	2	2		1	AM	3	3	3	3	3		1	AM	3	3	3	3	3		1	AM	3	3	3	3	3		1	AM	11	11	11	11	11
	PM	1	1	1	1	1			PM	2	2	2	2	2			PM	2	2	2	2	2			PM	3	3	3	3	3			PM	8	8	8	8	8
2	AM	2	2	2	2	2		2	AM	3	3	3	3	3		2	AM	3	3	3	3	3		2	AM	3	3	3	3	3		2	AM	11	11	11	11	11
	PM	2	2	2	2	2			PM	3	3	3	3	3			PM	3	3	3	3	3			PM	3	3	3	3	3			PM	11	11	11	11	11
3	AM	2	2	2	2	2		3	AM	3	3	3	3	3		3	AM	3	3	3	3	3		3	AM	3	3	3	3	3		3	AM	11	11	11	11	11
	PM	2	2	2	2	2			PM	3	3	3	3	3			PM	3	3	3	3	3			PM	3	3	3	3	3			PM	11	11	11	11	11
4	AM	2	1	1	2	2		4	AM	3	3	3	3	3		4	AM	3	3	3	3	3		4	AM	3	3	3	3	3		4	AM	11	10	10	11	11
	PM	2	1	1	2	2			PM	3	2	2	3	3			PM	3	3	3	3	3			PM	3	3	3	3	3			PM	11	9	9	11	11
5	AM	2	2	2	2	2		5	AM	3	2	2	3	3		5	AM	3	3	3	3	3		5	AM	3	3	3	3	3		5	AM	11	10	10	11	11
	PM	2	1	2	2	2			PM	3	3	3	3	3			PM	3	3	3	3	3			PM	3	3	3	3	3			PM	11	10	11	11	11
6	AM	2	2	2	2	2		6	AM	3	2	3	3	3		6	AM	3	2	3	3	3		6	AM	3	3	3	3	3		6	AM	11	9	11	11	11
	PM	2	2	2	2	2			PM	3	3	3	3	3			PM	3	3	3	3	3			PM	3	3	3	3	3			PM	11	11	11	11	11
7	AM	2	2	2	2	2		7	AM	3	3	3	3	3		7	AM	3	3	3	3	3		7	AM	3	3	3	3	3		7	AM	11	11	11	11	11
	PM	2	2	2	2	2			PM	3	3	3	3	3			PM	3	3	3	3	3			PM	3	3	3	3	3			PM	11	11	11	11	11
Group: Principal 2 (SQ Challenge/Plasma)					715
Apperance		Score 0-3						N Behavior		Score 0-3						P Behavior		Score 0-3						BCS		Score 0-3						Combined Clinical Score			Score 0-11
Mouse ID		A	B	C	D	E		Mouse ID		A	B	C	D	E		Mouse ID		A	B	C	D	E		Mouse ID		A	B	C	D	E		Mouse ID		A	B	C	D	E
DAY	Time							DAY	Time							DAY	Time							DAY	Time							DAY	Time
1	AM	2	2	2	2	2		1	AM	3	3	3	3	3		1	AM	3	3	3	3	3		1	AM	3	3	3	3	3		1	AM	11	11	11	11	11
	PM	1	1	1	1	1			PM	2	2	2	2	2			PM	2	2	2	2	2			PM	3	3	3	3	3			PM	8	8	8	8	8
2	AM	2	1	2	2	2		2	AM	3	2	3	3	3		2	AM	3	3	3	3	3		2	AM	3	3	3	3	3		2	AM	11	9	11	11	11
	PM	2	1	1	2	2			PM	3	2	2	3	3			PM	3	3	3	3	3			PM	3	3	3	3	3			PM	11	9	9	11	11
3	AM	2	2	1	2	2		3	AM	3	3	2	3	3		3	AM	3	3	3	3	3		3	AM	3	3	3	3	3		3	AM	11	11	9	11	11
	PM	2	2	2	2	2			PM	3	3	3	3	3			PM	3	3	3	3	3			PM	3	3	3	3	3			PM	11	11	11	11	11
4	AM	2	2	2	2	2		4	AM	3	3	3	3	3		4	AM	3	3	3	3	3		4	AM	3	3	3	3	3		4	AM	11	11	11	11	11
	PM	2	2	2	2	2			PM	3	3	3	3	3			PM	3	3	3	3	3			PM	3	3	3	3	3			PM	11	11	11	11	11
5	AM	2	2	1	2	2		5	AM	3	3	2	3	3		5	AM	3	3	3	3	3		5	AM	3	3	3	3	3		5	AM	11	11	9	11	11
	PM	2	2	2	2	2			PM	3	3	3	3	3			PM	3	3	3	3	3			PM	3	3	3	3	3			PM	11	11	11	11	11
6	AM	2	2	2	2	2		6	AM	3	3	3	3	3		6	AM	3	3	3	3	3		6	AM	3	3	3	3	3		6	AM	11	11	11	11	11
	PM	2	2	2	2	2			PM	3	3	3	3	3			PM	3	3	3	3	3			PM	3	3	3	3	3			PM	11	11	11	11	11
7	AM	2	2	2	2	2		7	AM	3	3	3	3	3		7	AM	3	3	3	3	3		7	AM	3	3	3	3	3		7	AM	11	11	11	11	11
	PM	2	2	2	2	2			PM	3	3	3	3	3			PM	3	3	3	3	3			PM	3	3	3	3	3			PM	11	11	11	11	11
Group: Principal 2 (SQ Challenge/Plasma)					716
Apperance		Score 0-3						N Behavior		Score 0-3						P Behavior		Score 0-3						BCS		Score 0-3						Combined Clinical Score			Score 0-11
Mouse ID		A	B	C	D	E		Mouse ID		A	B	C	D	E		Mouse ID		A	B	C	D	E		Mouse ID		A	B	C	D	E		Mouse ID		A	B	C	D	E
DAY	Time							DAY	Time							DAY	Time							DAY	Time							DAY	Time
1	AM	2	2	2	2	2		1	AM	3	3	3	3	3		1	AM	3	3	3	3	3		1	AM	3	3	3	3	3		1	AM	11	11	11	11	11
	PM	1	1	1	1	1			PM	2	2	2	2	2			PM	2	2	2	2	2			PM	3	3	3	3	3			PM	8	8	8	8	8
2	AM	2	2	2	2	2		2	AM	3	3	3	3	3		2	AM	3	3	3	3	3		2	AM	3	3	3	3	3		2	AM	11	11	11	11	11
	PM	2	2	2	2	1			PM	3	3	3	3	2			PM	3	3	3	3	3			PM	3	3	3	3	3			PM	11	11	11	11	9
3	AM	2	2	2	2	2		3	AM	3	3	3	3	3		3	AM	3	3	3	3	3		3	AM	3	3	3	3	3		3	AM	11	11	11	11	11
	PM	2	2	2	2	2			PM	3	3	3	3	3			PM	3	3	3	3	3			PM	3	3	3	3	3			PM	11	11	11	11	11
4	AM	2	2	2	2	2		4	AM	3	3	3	3	3		4	AM	3	3	3	3	3		4	AM	3	3	3	3	3		4	AM	11	11	11	11	11
	PM	2	2	1	2	1			PM	3	3	2	3	2			PM	3	3	3	3	3			PM	3	3	3	3	3			PM	11	11	9	11	9
5	AM	2	2	1	2	1		5	AM	3	3	2	3	2		5	AM	3	3	3	3	3		5	AM	3	3	3	3	3		5	AM	11	11	9	11	9
	PM	2	2	2	2	2			PM	3	3	3	3	3			PM	3	3	3	3	3			PM	3	3	3	3	3			PM	11	11	11	11	11
6	AM	2	1	2	2	1		6	AM	3	3	3	3	2		6	AM	3	3	3	3	3		6	AM	3	3	3	3	3		6	AM	11	10	11	11	9
	PM	2	2	2	2	2			PM	3	3	3	3	3			PM	3	3	3	3	3			PM	3	3	3	3	3			PM	11	11	11	11	11
7	AM	2	2	2	2	2		7	AM	3	3	2	3	3		7	AM	3	3	3	3	3		7	AM	3	3	3	3	3		7	AM	11	11	10	11	11
	PM	2	2	2	2	2			PM	3	3	3	3	3			PM	3	3	3	3	3			PM	3	3	3	3	3			PM	11	11	11	11	11
