# Supplementary material for: Passive protection against anthrax in mice with plasma derived from horses hyper-immunized against Bacillus anthracis Sterne strain
Source: PeerJ. 2017 Dec 15;5:e3907. doi: 10.7717/peerj.3907 (PMC5733894; doi:10.7717/peerj.3907)
Supplement: Supplemental Information 3 — Included are the CFUs for each animal and tissue type used to calculate the CFUs/gram tissue. [file peerj-05-3907-s003.xlsx]

## Sheet: Sheet1
Raw Plasma IN		CON IG IN			Raw plasma SC				CON Ig SC																						Raw Plasma			CON IG		Raw Plasma			CON IG
0		147000000			Lung		Liver		Lung			IN Challenge Control-Lung			O hr Raw		0 hr Con		24 Hr Raw		24 hr Con				SC Challenge Control-LIVER			SC Challenge Control-Lung			Lung Tx 0 hr			Lung Tx 0 hr		Liver Tx 0 hr			Liver Tx 0 hr
0		21000000			0		0		2000000			20000000	Raw		30000000		3670		20000000		0				90000	raw		2000000			160000			0		0			0
0		93300000			0		0		900000			20000000			90000000		0		10000000		3000				120000			900000			80000			0		0			0
0		7330000			0		0		500000			30000000			20000000		2330		200000000		0				130000			500000			140000			0		0			0
0		24700000			0		0		200000			20000000			20000000		0		50000000		2670				120000			200000			200000			0		0			0
0		5000000			0		0		1000000			10000000			40000000		2330		20000000		2330				120000			1000000			60000			0		0			0
0		12000000			0		0		1000000			10000000			30000000		2670		9000000		1470000				130000			1000000			206700			0		0			0
0		3670000			0		0		2000000			20000000			40000000		0		100000000		0				90000			2000000			200000			0		0			0
0		90000000			0		0		1000000			10000000			70000000		1670		30000000		3330				120000			1000000			103300			0		0			0
0		160000000			0		0		1000000			30000000			20000000		3000		30000000		2000				80000			1000000			80000			0		0			0
0		8330000			0		0		20000			30000000			20000000		0		10000000		2330				60000			20000			130000			0		0			0
0		46700000			0		0		200000			10000000					0		60000000		0				47000			200000			170000			0		0			0
0		46700000			0		0		90000			20000000					4000				2670				40000			90000			170000			0		0			0
0		140000000			0		0		1000000			10000000					0				2670				50000			1000000			103300			0		0			0
0		96700000			0		0		200000			30000000					4300				0				110000			200000			40000			0		0			0
0		0			0		0		10000			30000000					3300				0				80000			10000			40000			0		0			0
0		0			0		0		0			30000000
0		0			0		0		0			80000000																50000
0		0			0		0		0																			140000			170000	Lung Tx 24 hr		0	Lung Tx 24 hr	0	Liver Tx 24 hr		0	Liver Tx 24 hr
0		0			0		0		0			147000000	Con												83300	Con		90000			170000			0		0			0
0		0			0		0		0			21000000													90000			160000			183300			0		0			0
0		0			0		0		0			93300000													93300			103000			200000			0		0			0
0		0			0		0		0			7330000													56700			103000			110000			0		0			0
0		0			0		0		0			24700000													106700			50000			40000			0		0			0
0		0			0		0		0			5000000													120000			100000			190000			0		0			5670
0		0			0		0		0			12000000													60000			80000			110000			0		0			11000
0		0			0		0		0			3670000													106700			110000			140000			0		0			0
0		0			0		0		0			90000000													80000			200000			86700			0		0			0
0		0			0		0		0			160000000													40000			90000			100000			0		0			0
0		0			0		0		0			8330000			Challenge Control	Native Plasma Tx 0 Hr	Native Plasma Tx 24 Hr	Concentrated Ig Tx 0 Hr	Concentrated Ig Tx 24 Hr						130000			160000			206700			0		0			0
		0			0		0		0			46700000			4.10134e+07	38000000	49000000	1818	99400						73300			100000			110000			0		0			0
		0			50000		90000		0			46700000			7.72224e+06	7.57188e+06	1.72073e+07	431.209	97900.6						110000			190000			110000			0		0			0
		0			140000		120000		0			140000000													56700						186700			0		0			0	1111.33
		0			90000		130000		0			96700000													100000
		0			160000		120000		0			Mean CFU/gram
		0			103000		120000		0
		0			103000		130000		0
		0			50000		90000		0
		0			100000		120000		0																						SC Lung Tissue															SC Liver
		0			80000		80000		0			Challenge Control			Native Plasma Tx 0 Hr			Native Plasma Tx 24 Hr				Concentrated Ig Tx 0 Hr			Concentrated Ig Tx 24 Hr						Challenge Control SC Lung			Raw Plasma SC Lung Tx 0 hr			Raw Plasma SC Lung Tx 24 hr			Concentrated Ig Tx 0 hr			Concentrated Ig Tx 24 hr			Challenge Control SC Liver			Native Plasma SC Liver Tx 0 hr
		0			110000		60000		0
		0			200000		47000		0			Mean	4.10134e+07		Mean	38000000		Mean	49000000			Mean	1818		Mean	99400					Mean	428200		Mean	125553		Mean	140893		Mean	0		Mean	0		Mean	89790		Mean
		0			90000		40000		0			Standard Error	7.72224e+06		Standard Error	7.57188e+06		Standard Error	1.72073e+07			Standard Error	431.209		Standard Error	97900.6					Standard Error	101232		Standard Error	14978.1		Standard Error	12805.1		Standard Error	0		Standard Error	0		Standard Error	5236.69		Standard Error
		0			160000		50000		0			Median	22850000		Median	30000000		Median	30000000			Median	2330		Median	2330					Median	160000		Median	130000		Median	140000		Median	0		Median	0		Median	90000		Median
		0			100000		110000		0			Mode	30000000		Mode	20000000		Mode	20000000			Mode	0		Mode	0					Mode	1000000		Mode	80000		Mode	110000		Mode	0		Mode	0		Mode	120000		Mode
		3670			190000		80000		0			Standard Deviation	4.36836e+07		Standard Deviation	2.39444e+07		Standard Deviation	5.70701e+07			Standard Deviation	1670.07		Standard Deviation	379167					Standard Deviation	554473		Standard Deviation	58009.9		Standard Deviation	49593.8		Standard Deviation	0		Standard Deviation	0		Standard Deviation	28682.5		Standard Deviation
		0			160000		30000		0			Sample Variance	1.90826e+15		Sample Variance	5.73333e+14		Sample Variance	3257000000000000			Sample Variance	2.78912e+06		Sample Variance	1.43768e+11					Sample Variance	3.0744e+11		Sample Variance	3.36515e+09		Sample Variance	2.45954e+09		Sample Variance	0		Sample Variance	0		Sample Variance	8.22686e+08		Sample Variance
30000000		2330			80000		110000		0			Kurtosis	1.63751		Kurtosis	1.49589		Kurtosis	5.08857			Kurtosis	-1.71576		Kurtosis	14.9995					Kurtosis	2.51119		Kurtosis	-1.35521		Kurtosis	-0.780391		Kurtosis	#DIV/0!		Kurtosis	#DIV/0!		Kurtosis	-1.15984		Kurtosis
90000000		0			140000		30000		0			Skewness	1.62039		Skewness	1.50785		Skewness	2.1908			Skewness	0.0312932		Skewness	3.8729					Skewness	1.75634		Skewness	-0.0701084		Skewness	-0.365501		Skewness	#DIV/0!		Skewness	#DIV/0!		Skewness	-0.25198		Skewness
20000000		2330			200000		50000		0			Range	156330000		Range	70000000		Range	191000000			Range	4300		Range	1470000					Range	1990000		Range	166700		Range	166700		Range	0		Range	0		Range	90000		Range
20000000		2670			60000		110000		0			Minimum	3670000		Minimum	20000000		Minimum	9000000			Minimum	0		Minimum	0					Minimum	10000		Minimum	40000		Minimum	40000		Minimum	0		Minimum	0		Minimum	40000		Minimum
40000000		0			207000		80000		0			Maximum	160000000		Maximum	90000000		Maximum	200000000			Maximum	4300		Maximum	1470000					Maximum	2000000		Maximum	206700		Maximum	206700		Maximum	0		Maximum	0		Maximum	130000		Maximum
30000000		1670			200000		70000		0			Sum	1312430000		Sum	380000000		Sum	539000000			Sum	27270		Sum	1491000					Sum	12846000		Sum	1883300		Sum	2113400		Sum	0		Sum	0		Sum	2693700		Sum
40000000		3000			103000		90000		0			Count	32		Count	10		Count	11			Count	15		Count	15					Count	30		Count	15		Count	15		Count	15		Count	15		Count	30		Count
70000000		0			80000		70000		0
20000000		0			130000		30000		0
20000000		4000			170000		40000		0
20000000		0			170000		80000		0
10000000		4300			103000		120000		0
200000000		3300			40000		110000		0
50000000		0			40000		90000		0
20000000		3000			170000		83000		0
9000000		0			170000		110000		30000
100000000		2670			183000		90000		90000
30000000		2330			200000		80000		0
30000000		1470000			110000		40000		0
10000000		0			40000		80000		0
60000000		3330			190000		50000		0
		2000			110000		67000		0
		2330			140000		50000		0
		0			86700		80000		0
		2670			100000		40000		0
		2670			207000		120000		0
		0			110000		93000		0
		0			110000		130000		0
							50000		60000
[truncated: 7 more columns]
